# Supplementary figures and images for: Teach-back of discharge instructions in the emergency department: a pre–post pilot evaluation
Source: HighWire-hosted journal article supplement (doi:10.1136/emermed-2020-210168), 2021-06-17

Time plots and histograms on older participants' retention of discharge instructions

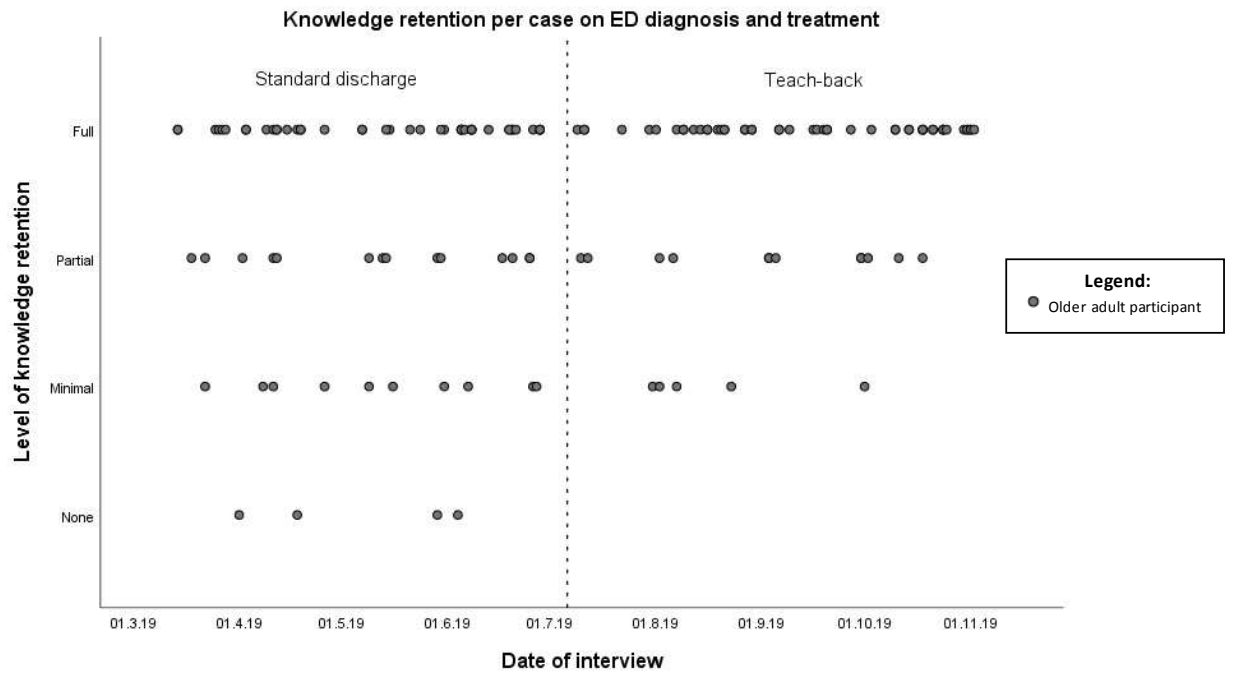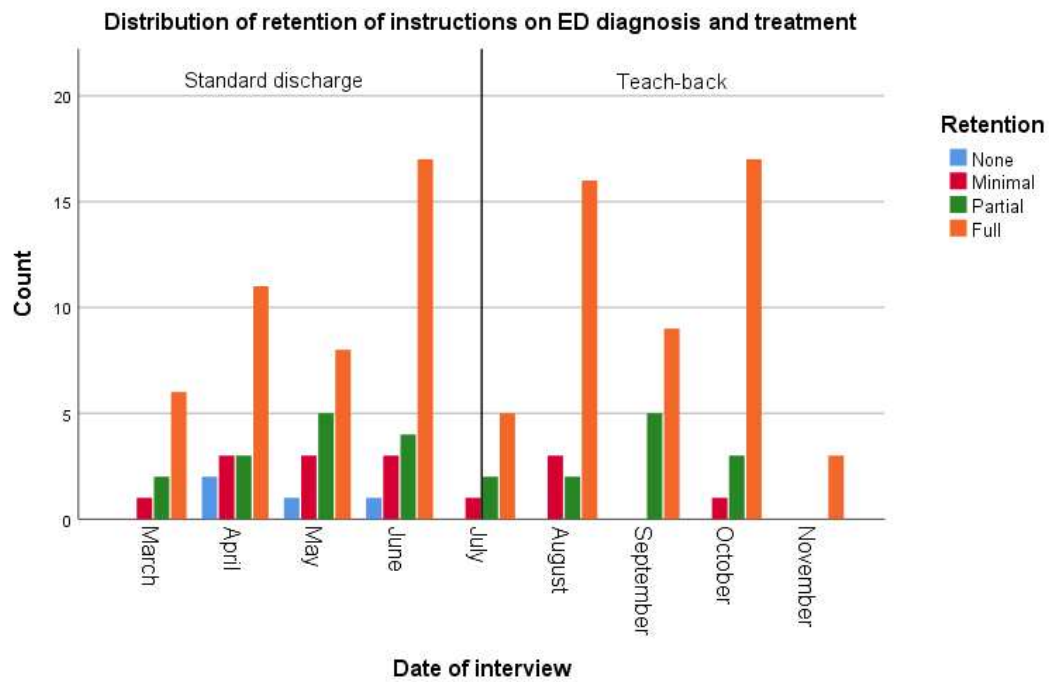

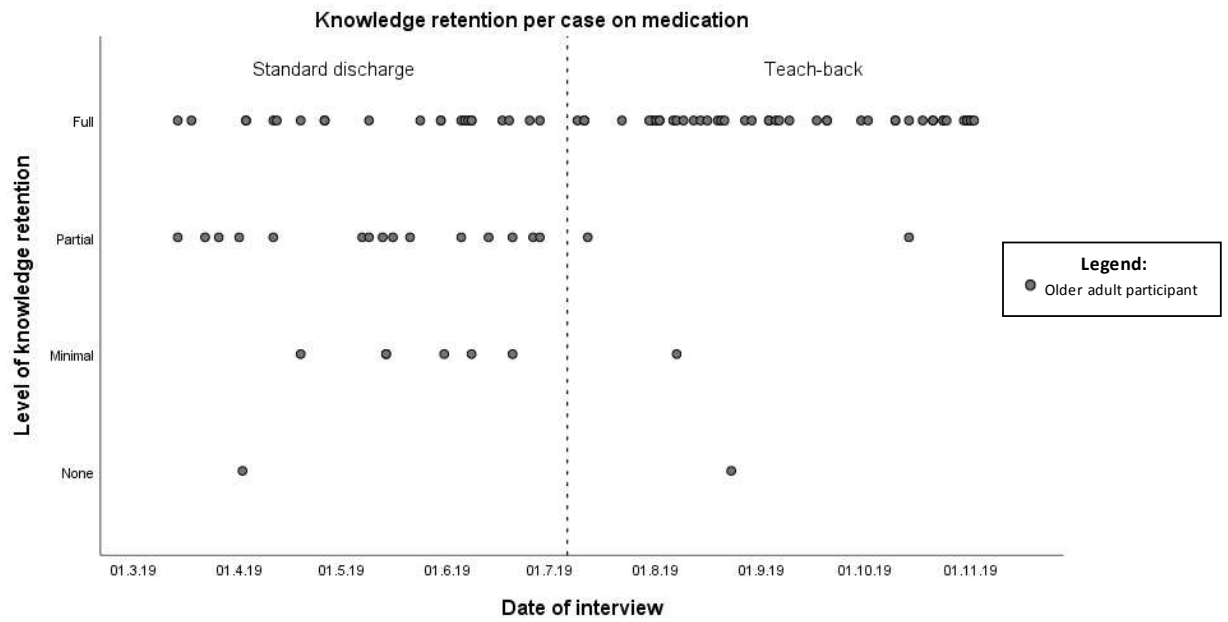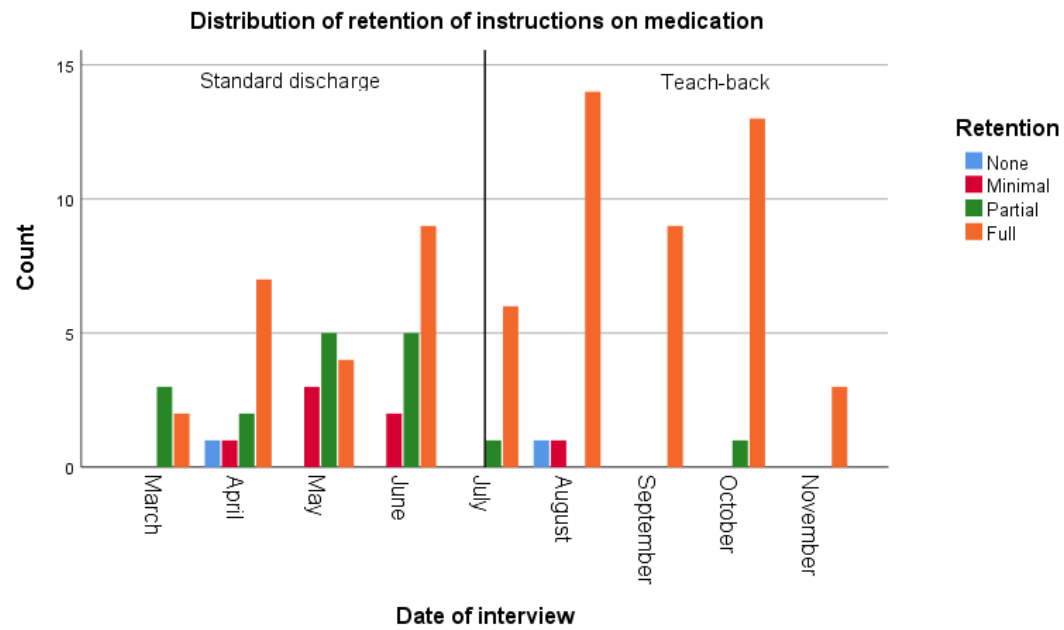

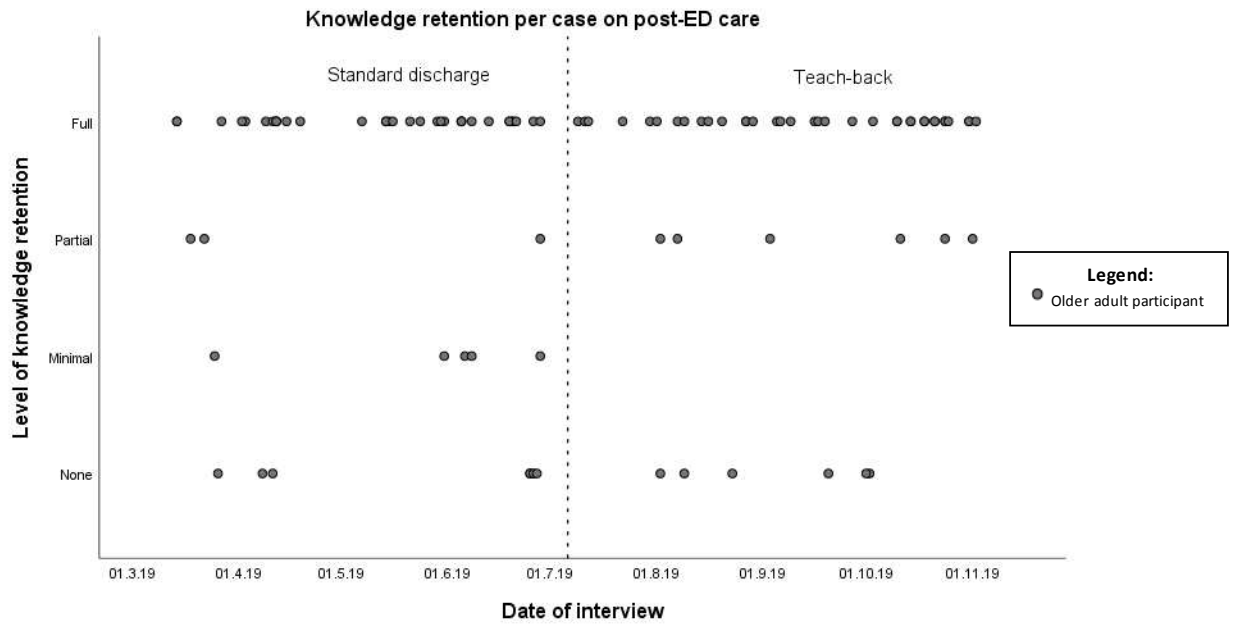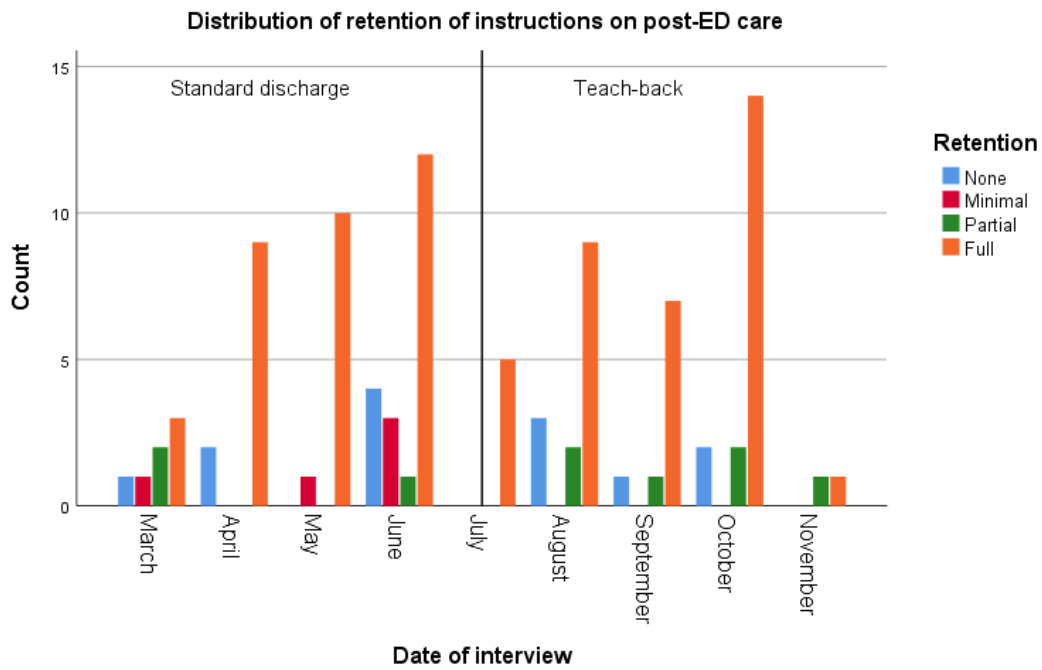

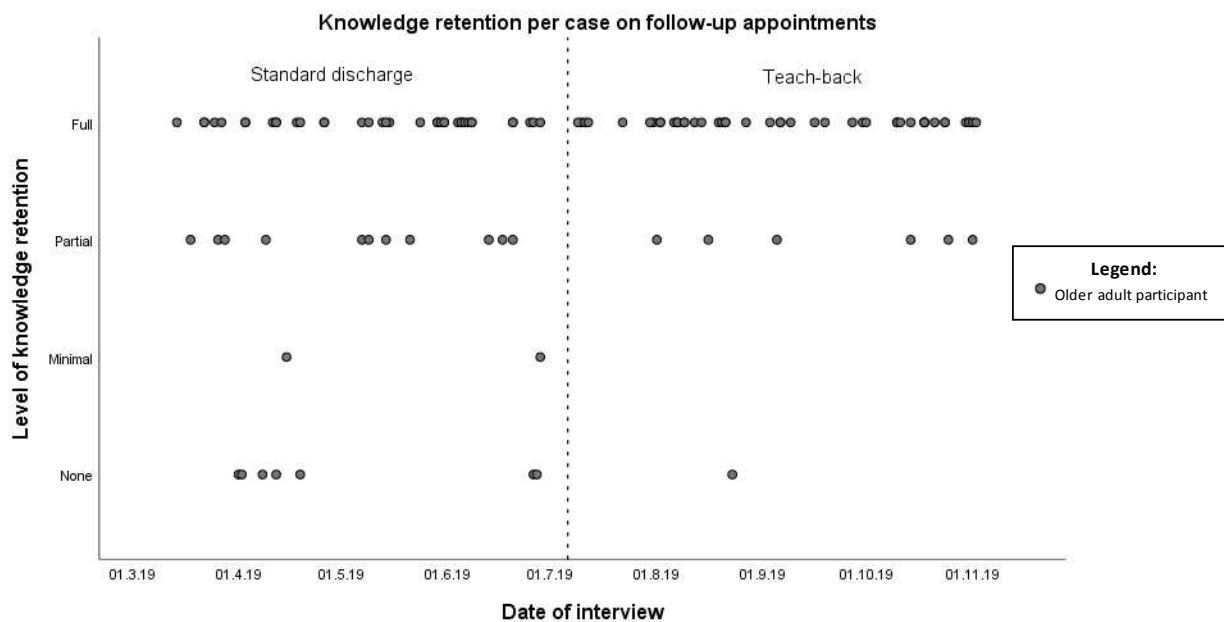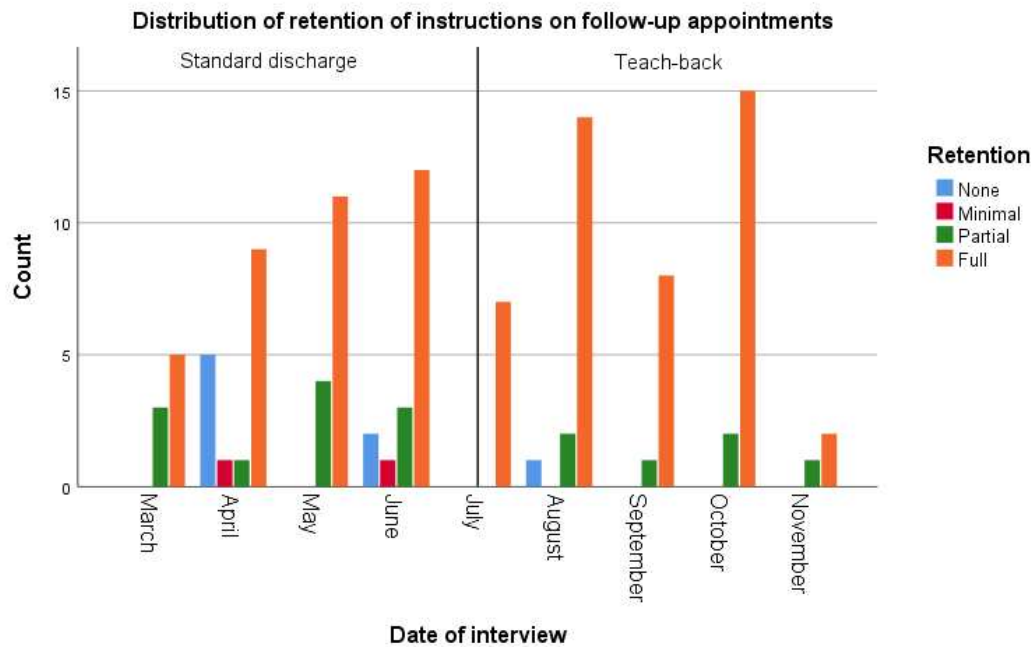

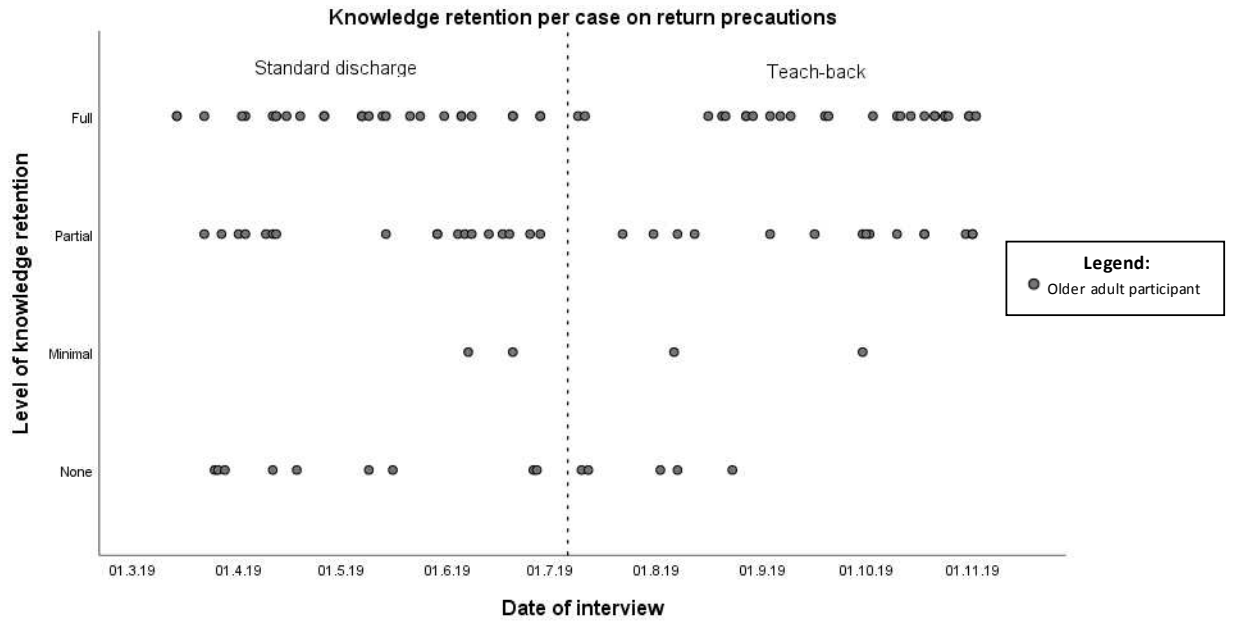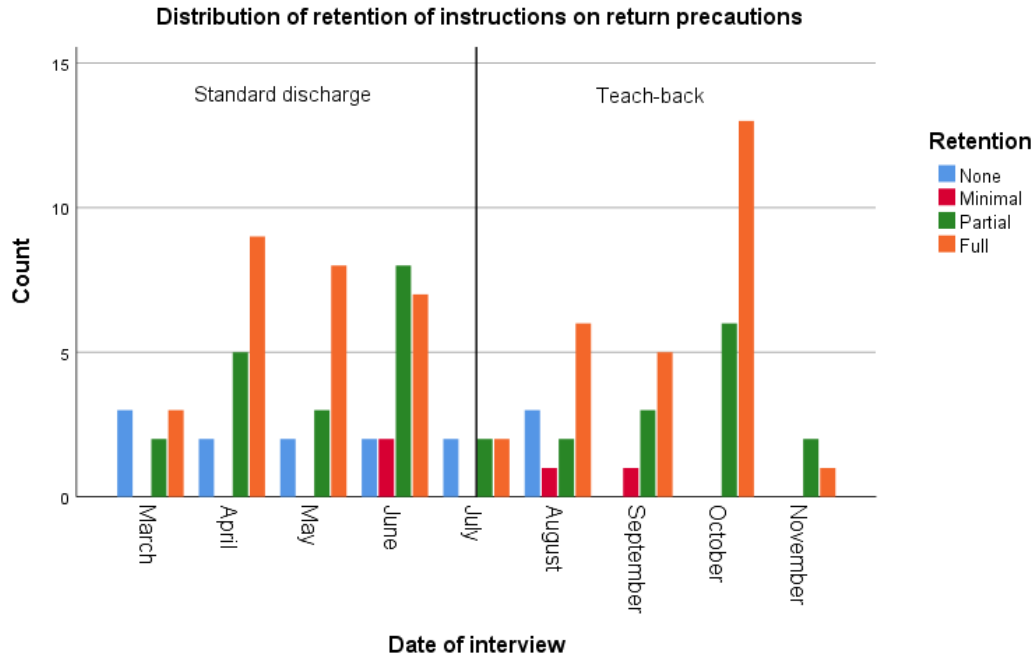

Supplement: emermed-2020-210168supp005_data_supplement.pdf [file emermed-2020-210168supp005_data_supplement.pdf]
